# Supplementary material for: Functional analysis of ESRP1/2 gene variants and CTNND1 isoforms in orofacial cleft pathogenesis
Source: PubMed Central journal article supplement — Commun Biol. 2024 Aug 23;7:1040. doi: 10.1038/s42003-024-06715-3 (PMC11344038; doi:10.1038/s42003-024-06715-3), 2024-08-23
Supplement: 42003_2024_6715_MOESM2_ESM.pdf [file 42003_2024_6715_MOESM2_ESM.pdf]

1 Supplemental Information

Figure 1 supp.

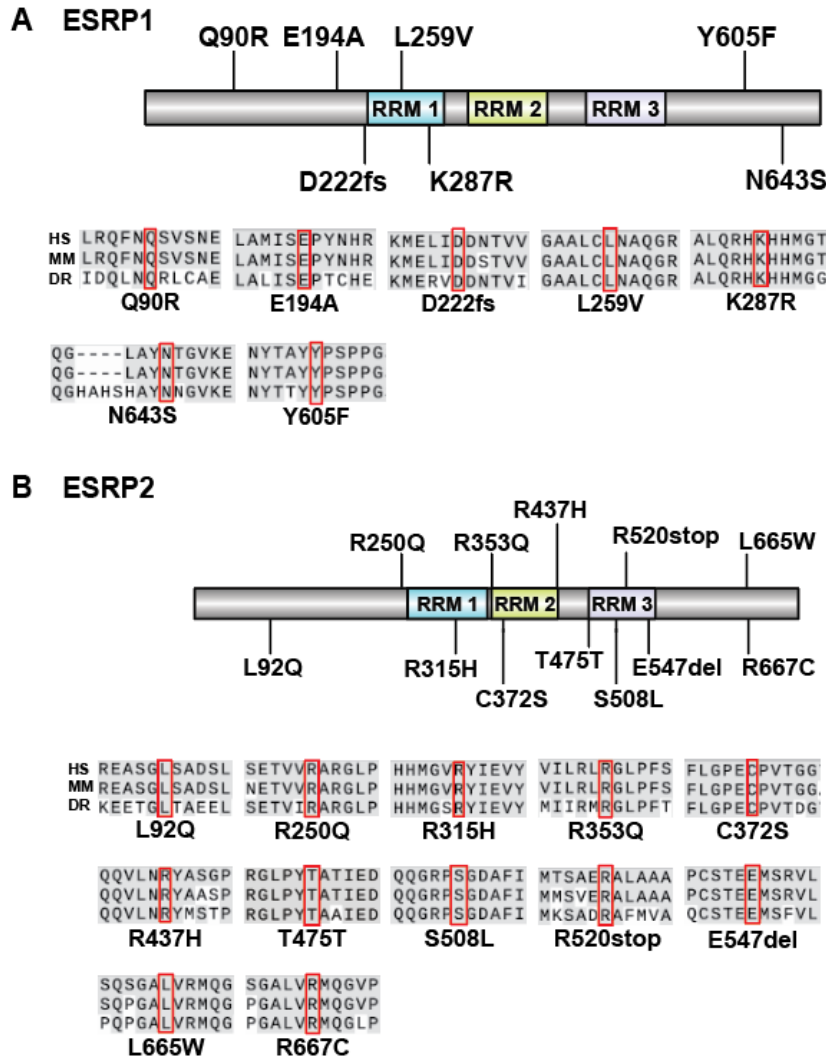

2  
3 **Supplementary Figure 1. Selection of evolutionarily conserved *ESRP1* and *ESRP2* gene**  
4 **variants.** *ESRP1* and *ESRP2* gene variants were identified from OFC cases in the GMFK  
5 Children's dataset and ClinVar variants associated with cleft lip and/or palate or autosomal  
6 recessive deafness. Gene variants disrupting amino acid residues that are fully conserved  
7 between humans, mice, and zebrafish were selected: 7 in *ESRP1*, 12 in *ESRP2*. **(A)**  
8 Schematic of the *ESRP1* protein labeled with 7 identified gene variants, including two variants in RRM1.  
9 Truncated alignments surrounding the gene variants are provided below the diagram. **(B)**  
10 Schematic of the *ESRP2* protein labeled with 12 identified gene variants, including two variants  
11 in each of RRM1 and RRM2, three variants are in RRM3. A silent variant *ESRP2* T475T was  
12 used as a negative control. Truncated alignments surrounding the gene variants are provided  
13 below the diagram. Fully conserved residues between human, zebrafish, and mouse amino acid  
14 sequences surrounding the gene variants are highlighted in grey.

15 Figure 2 supp.  
16

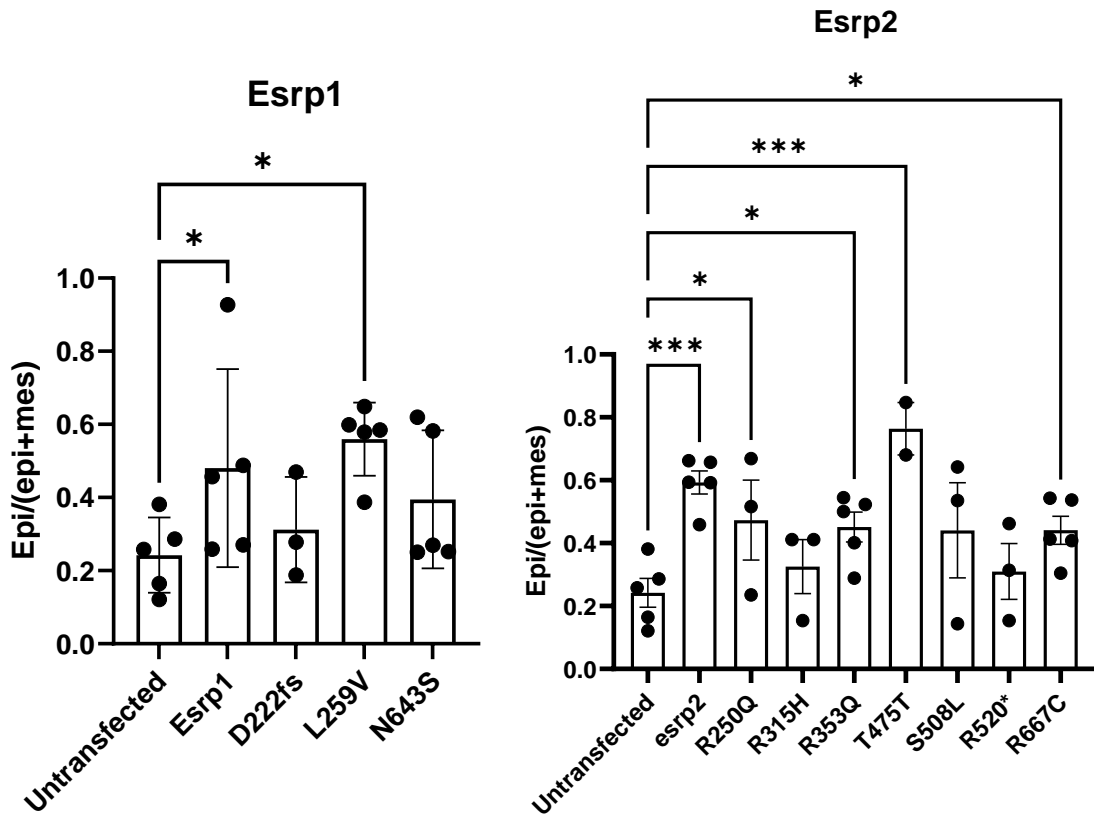

17  
18  
19  
20  
21  
22  
23  
24  
25  
26  
27  
28  
29  
30  
31

**Supplementary Figure 2. Py2T rescue assay statistical analysis.** *ESRP1* and *ESRP2* specific variants were analyzed using ordinary one-way ANOVA to confirm rescue statistical significance in comparison with untransfected cells. Data mean  $\pm$  SEM, \* $p < 0.05$ , \*\*\* $p < 0.001$ .

32 **Figure 3 supp.**

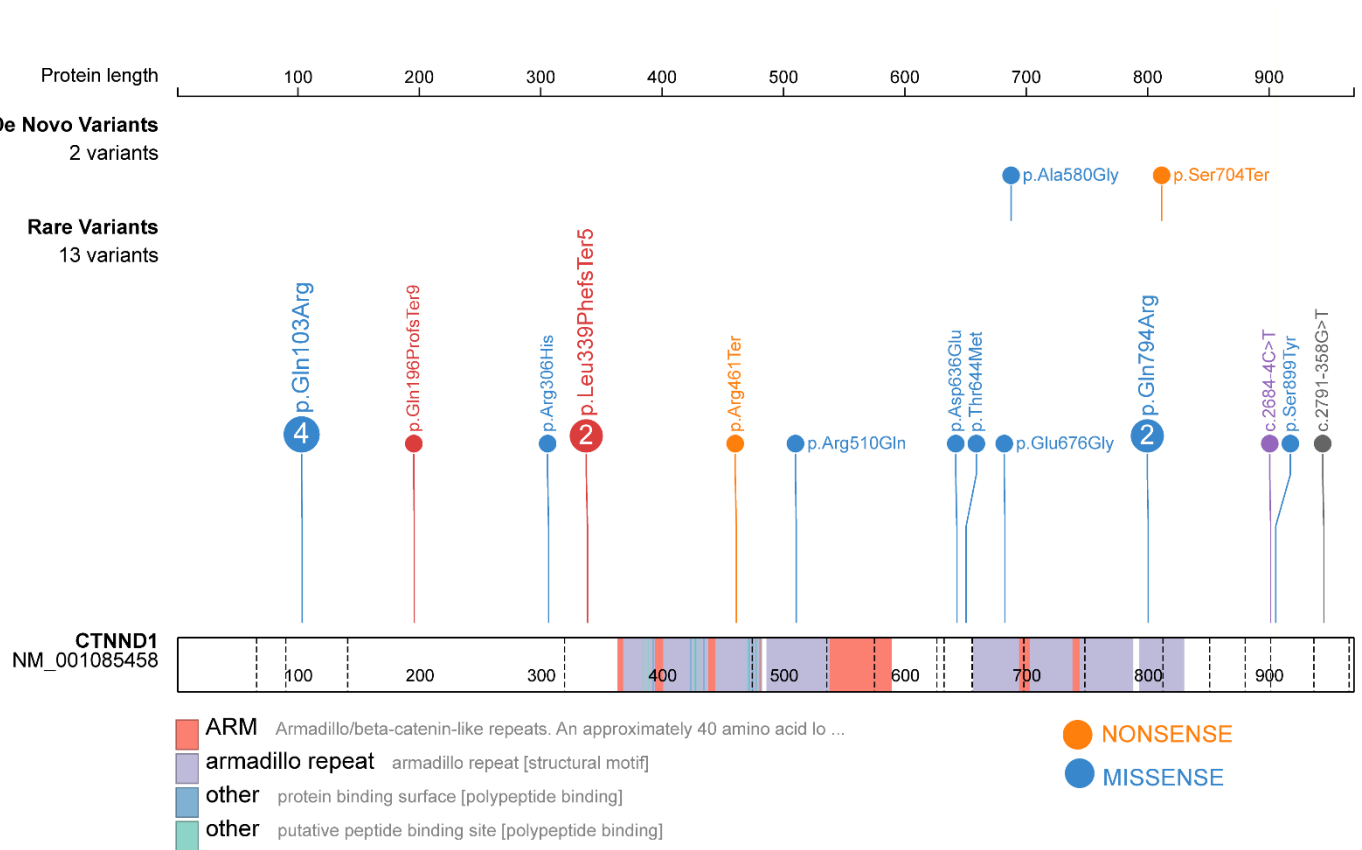

33

34 **Supplementary Figure 3. CTNND1 variants from OFC cohorts.** 15 variants were identified in  
 35 759 OFC trios. 2 Variants were de novo, and 13 were considered rare variants.

36

37

38

39

40

41

42

43

44

45

46

## 47 Supplemental Table 1

| ESRP1   |                                              |            |            |              |                          |                         |         |                                       |
|---------|----------------------------------------------|------------|------------|--------------|--------------------------|-------------------------|---------|---------------------------------------|
| variant | CHR:BP (hg38)                                | Ref Allele | Alt Allele | rs id        | Transcript Change        | AA Change               | Source  | Associated disease                    |
| Q90R    | 8:94643310                                   | A          | G          | rs778878601  | NM_017697.4:c.269A>G     | NP_060167.2:p.Gln90Arg  | GMKF    | -                                     |
| E194A   | 8:94662362                                   | A          | C          | rs1302067900 | NM_017697.4:c.581A>C     | NP_060167.2:p.Glu194Ala | GMKF    | -                                     |
| D222fs  | 8:94664716-94664734-19bp deletion bp 665-683 | -          | -          | -            | NM_017697.4:c.665_683del | NP_060167.2:p.Asp222fs  | ClinVar | Hearing loss, autosomal recessive 109 |
| L259V   | 8:94664946                                   | C          | G          | rs1554577402 | NM_017697.4:c.775C>G     | NP_060167.2:p.Leu259Val | ClinVar | Hearing loss, autosomal recessive 109 |
| K287R   | 8:94665031                                   | A          | G          | rs747729420  | NM_017697.4:c.860A>G     | NP_060167.2:p.Lys287Arg | GMKF    | -                                     |
| Y605F   | 8:94678365                                   | A          | T          | rs1228296571 | NM_017697.4:c.1814A>T    | NP_060167.2:p.Tyr605Phe | GMKF    | -                                     |
| N643S   | 8:94692784                                   | A          | G          | rs767362823  | NM_017697.4:c.1928A>G    | NP_060167.2:p.Asn643Ser | GMKF    | -                                     |

48

| ESRP2    |                      |            |            |              |                       |                         |         |                                        |
|----------|----------------------|------------|------------|--------------|-----------------------|-------------------------|---------|----------------------------------------|
| variant  | CHR:BP (hg38)        | Ref Allele | Alt Allele | rs id        | Transcript Change     | AA Change               | Source  | Associated disease                     |
| L92Q     | 16:68235686          | A          | T          | rs1567566981 | NM_024939.3:c.275T>A  | NP_079215.2:p.Leu92Gln  | GMKF    | -                                      |
| R250Q    | 16:68232649          | C          | T          | rs755729355  | NM_024939.3:c.749G>A  | NP_079215.2:p.Arg250Gln | ClinVar | Cleft lip with or without cleft palate |
| R315H    | 16:68232381          | G          | A          | rs751873605  | NM_024939.3:c.944G>A  | NP_079215.2:p.Arg315His | ClinVar | Cleft lip with or without cleft palate |
| R353Q    | 16:68232043          | C          | T          | rs201908706  | NM_024939.3:c.1058G>A | NP_079215.2:p.Arg353Gln | GMKF    | -                                      |
| C372S    | 16:68231987          | A          | T          | rs149234558  | NM_024939.3:c.1114T>A | NP_079215.2:p.Cys372Ser | GMKF    | -                                      |
| R437H    | 16:68231684          | C          | T          | rs750375203  | NM_024939.3:c.1310G>A | NP_079215.2:p.Arg437His | GMKF    | -                                      |
| T475T    | 16:68231569          | G          | A          | rs56323755   | NM_024939.3:c.1425G>A | NP_079215.2:p.Thr475=   | GMKF    | -                                      |
| S508L    | 16:68231366          | C          | T          | rs143677348  | NM_024939.3:c.1523C>T | NP_079215.2:p.Ser508Leu | ClinVar | Cleft lip with or without cleft palate |
| R520stop | 16:68231331          | C          | T          | rs142168544  | NM_024939.3:c.1558C>T | NP_079215.2:p.Arg520Ter | ClinVar | Cleft lip with or without cleft palate |
| E547del  | 16:68231248-68231250 | GAG        | -          | -            | NM_024939.3:c.1636GAG | NP_079215.2:p.Glu547del | ClinVar | Cleft lip with or without cleft palate |
| L665W    | 16:68230459          | A          | C          | rs373594090  | NM_024939.3:c.1994T>G | NP_079215.2:p.Leu665Trp | GMKF    | -                                      |
| R667C    | 16:68230454          | G          | A          | rs575114143  | NM_024939.3:c.1999C>T | NP_079215.2:p.Arg667Cys | GMKF    | -                                      |

49

50
