# Supplementary material for: Functional analysis of ESRP1/2 gene variants and CTNND1 isoforms in orofacial cleft pathogenesis
Source: PubMed Central journal article supplement — Commun Biol. 2024 Aug 23;7:1040. doi: 10.1038/s42003-024-06715-3 (PMC11344038; doi:10.1038/s42003-024-06715-3), 2024-08-23
Supplement: 42003_2024_6715_MOESM3_ESM.pdf [file 42003_2024_6715_MOESM3_ESM.pdf]

## Description of Additional Supplementary Files

**File name:** Supplementary Data 1

**Description:** The source data behind the graphs in the paper.
