# Supplementary material for: Functional analysis of ESRP1/2 gene variants and CTNND1 isoforms in orofacial cleft pathogenesis
Source: PubMed Central journal article supplement — Commun Biol. 2024 Aug 23;7:1040. doi: 10.1038/s42003-024-06715-3 (PMC11344038; doi:10.1038/s42003-024-06715-3), 2024-08-23
Supplement: 42003_2024_6715_MOESM5_ESM.pdf [file 42003_2024_6715_MOESM5_ESM.pdf]

## Reporting Summary

Nature Portfolio wishes to improve the reproducibility of the work that we publish. This form provides structure for consistency and transparency in reporting. For further information on Nature Portfolio policies, see our [Editorial Policies](#) and the [Editorial Policy Checklist](#).

### Statistics

For all statistical analyses, confirm that the following items are present in the figure legend, table legend, main text, or Methods section.

n/a Confirmed

- The exact sample size ( $n$ ) for each experimental group/condition, given as a discrete number and unit of measurement
- A statement on whether measurements were taken from distinct samples or whether the same sample was measured repeatedly
- The statistical test(s) used AND whether they are one- or two-sided  
*Only common tests should be described solely by name; describe more complex techniques in the Methods section.*
- A description of all covariates tested
- A description of any assumptions or corrections, such as tests of normality and adjustment for multiple comparisons
- A full description of the statistical parameters including central tendency (e.g. means) or other basic estimates (e.g. regression coefficient) AND variation (e.g. standard deviation) or associated estimates of uncertainty (e.g. confidence intervals)
- For null hypothesis testing, the test statistic (e.g.  $F$ ,  $t$ ,  $r$ ) with confidence intervals, effect sizes, degrees of freedom and  $P$  value noted  
*Give  $P$  values as exact values whenever suitable.*
- For Bayesian analysis, information on the choice of priors and Markov chain Monte Carlo settings
- For hierarchical and complex designs, identification of the appropriate level for tests and full reporting of outcomes
- Estimates of effect sizes (e.g. Cohen's  $d$ , Pearson's  $r$ ), indicating how they were calculated

*Our web collection on [statistics for biologists](#) contains articles on many of the points above.*

### Software and code

Policy information about [availability of computer code](#)

Data collection

Data analysis

For manuscripts utilizing custom algorithms or software that are central to the research but not yet described in published literature, software must be made available to editors and reviewers. We strongly encourage code deposition in a community repository (e.g. GitHub). See the Nature Portfolio [guidelines for submitting code & software](#) for further information.

### Data

Policy information about [availability of data](#)

All manuscripts must include a [data availability statement](#). This statement should provide the following information, where applicable:

- Accession codes, unique identifiers, or web links for publicly available datasets
- A description of any restrictions on data availability
- For clinical datasets or third party data, please ensure that the statement adheres to our [policy](#)

## Research involving human participants, their data, or biological material

Policy information about studies with [human participants or human data](#). See also policy information about [sex, gender \(identity/presentation\), and sexual orientation](#) and [race, ethnicity and racism](#).

|                                                                    |     |
|--------------------------------------------------------------------|-----|
| Reporting on sex and gender                                        | N/A |
| Reporting on race, ethnicity, or other socially relevant groupings | N/A |
| Population characteristics                                         | N/A |
| Recruitment                                                        | N/A |
| Ethics oversight                                                   | N/A |

Note that full information on the approval of the study protocol must also be provided in the manuscript.

## Field-specific reporting

Please select the one below that is the best fit for your research. If you are not sure, read the appropriate sections before making your selection.

Life sciences       Behavioural & social sciences       Ecological, evolutionary & environmental sciences

For a reference copy of the document with all sections, see [nature.com/documents/nr-reporting-summary-flat.pdf](https://www.nature.com/documents/nr-reporting-summary-flat.pdf)

## Life sciences study design

All studies must disclose on these points even when the disclosure is negative.

|                 |                                                                                                       |
|-----------------|-------------------------------------------------------------------------------------------------------|
| Sample size     | All of our sample sizes are described withing the text or figure legends.                             |
| Data exclusions | No data exclusions                                                                                    |
| Replication     | All the experiments were done at least in triplicates.                                                |
| Randomization   | All the samples were randomized                                                                       |
| Blinding        | All the fish larvae experiments were blinded because the larvae were genotyped after the experiments. |

## Behavioural & social sciences study design

All studies must disclose on these points even when the disclosure is negative.

|                   |     |
|-------------------|-----|
| Study description | N/A |
| Research sample   | N/A |
| Sampling strategy | N/A |
| Data collection   | N/A |
| Timing            | N/A |
| Data exclusions   | N/A |
| Non-participation | N/A |
| Randomization     | N/A |

# Ecological, evolutionary & environmental sciences study design

All studies must disclose on these points even when the disclosure is negative.

|                          |                                  |
|--------------------------|----------------------------------|
| Study description        | <input type="text" value="N/A"/> |
| Research sample          | <input type="text" value="N/A"/> |
| Sampling strategy        | <input type="text" value="N/A"/> |
| Data collection          | <input type="text" value="N/A"/> |
| Timing and spatial scale | <input type="text" value="N/A"/> |
| Data exclusions          | <input type="text" value="N/A"/> |
| Reproducibility          | <input type="text" value="N/A"/> |
| Randomization            | <input type="text" value="N/A"/> |
| Blinding                 | <input type="text" value="N/A"/> |

Did the study involve field work?  Yes  No

## Field work, collection and transport

|                        |                                  |
|------------------------|----------------------------------|
| Field conditions       | <input type="text" value="N/A"/> |
| Location               | <input type="text" value="N/A"/> |
| Access & import/export | <input type="text" value="N/A"/> |
| Disturbance            | <input type="text" value="N/A"/> |

## Reporting for specific materials, systems and methods

We require information from authors about some types of materials, experimental systems and methods used in many studies. Here, indicate whether each material, system or method listed is relevant to your study. If you are not sure if a list item applies to your research, read the appropriate section before selecting a response.

### Materials & experimental systems

|                                     |                                                                 |
|-------------------------------------|-----------------------------------------------------------------|
| n/a                                 | Involvement in the study                                        |
| <input checked="" type="checkbox"/> | <input type="checkbox"/> Antibodies                             |
| <input type="checkbox"/>            | <input checked="" type="checkbox"/> Eukaryotic cell lines       |
| <input checked="" type="checkbox"/> | <input type="checkbox"/> Palaeontology and archaeology          |
| <input type="checkbox"/>            | <input checked="" type="checkbox"/> Animals and other organisms |
| <input checked="" type="checkbox"/> | <input type="checkbox"/> Clinical data                          |
| <input checked="" type="checkbox"/> | <input type="checkbox"/> Dual use research of concern           |
| <input checked="" type="checkbox"/> | <input type="checkbox"/> Plants                                 |

### Methods

|                                     |                                                 |
|-------------------------------------|-------------------------------------------------|
| n/a                                 | Involvement in the study                        |
| <input checked="" type="checkbox"/> | <input type="checkbox"/> ChIP-seq               |
| <input checked="" type="checkbox"/> | <input type="checkbox"/> Flow cytometry         |
| <input checked="" type="checkbox"/> | <input type="checkbox"/> MRI-based neuroimaging |

## Antibodies

|                 |                                  |
|-----------------|----------------------------------|
| Antibodies used | <input type="text" value="N/A"/> |
| Validation      | <input type="text" value="N/A"/> |

## Eukaryotic cell lines

Policy information about [cell lines and Sex and Gender in Research](#)

|                                                                      |                                                                                                                                                                      |
|----------------------------------------------------------------------|----------------------------------------------------------------------------------------------------------------------------------------------------------------------|
| Cell line source(s)                                                  | <i>The cells used in this project were donated from Russ P. Carstens. doi: 10.1016/j.celrep.2018.10.097. The Py2T cells are a stable murine breast cancer cells.</i> |
| Authentication                                                       | <i>The cell line was not authenticated</i>                                                                                                                           |
| Mycoplasma contamination                                             | <i>Cell lines were not tested for mycoplasma</i>                                                                                                                     |
| Commonly misidentified lines<br>(See <a href="#">ICLAC</a> register) | <i>No misidentified cell lines were used in this study</i>                                                                                                           |

## Palaeontology and Archaeology

|                                                                                                                                                 |            |
|-------------------------------------------------------------------------------------------------------------------------------------------------|------------|
| Specimen provenance                                                                                                                             | <i>N/A</i> |
| Specimen deposition                                                                                                                             | <i>N/A</i> |
| Dating methods                                                                                                                                  | <i>N/A</i> |
| <input type="checkbox"/> Tick this box to confirm that the raw and calibrated dates are available in the paper or in Supplementary Information. |            |
| Ethics oversight                                                                                                                                | <i>N/A</i> |

Note that full information on the approval of the study protocol must also be provided in the manuscript.

## Animals and other research organisms

Policy information about [studies involving animals; ARRIVE guidelines](#) recommended for reporting animal research, and [Sex and Gender in Research](#)

|                         |                                                                                                               |
|-------------------------|---------------------------------------------------------------------------------------------------------------|
| Laboratory animals      | <i>Zebrafish, Danio rerio larvae was used for this study between 0 to 7 days post fertilization</i>           |
| Wild animals            | <i>This study did not involve wild animals</i>                                                                |
| Reporting on sex        | <i>Since the animals used were embryos and larvae they didn't have a determined sex yet.</i>                  |
| Field-collected samples | <i>This study does not involve samples collected from the field</i>                                           |
| Ethics oversight        | <i>All the protocols to work with zebrafish were institutional approved at Massachusetts General Hospital</i> |

Note that full information on the approval of the study protocol must also be provided in the manuscript.

## Clinical data

Policy information about [clinical studies](#)

All manuscripts should comply with the ICMJE [guidelines for publication of clinical research](#) and a completed [CONSORT checklist](#) must be included with all submissions.

|                             |            |
|-----------------------------|------------|
| Clinical trial registration | <i>N/A</i> |
| Study protocol              | <i>N/A</i> |
| Data collection             | <i>N/A</i> |
| Outcomes                    | <i>N/A</i> |

## Dual use research of concern

Policy information about [dual use research of concern](#)

### Hazards

Could the accidental, deliberate or reckless misuse of agents or technologies generated in the work, or the application of information presented in the manuscript, pose a threat to:

- |                                     |                                                     |
|-------------------------------------|-----------------------------------------------------|
| No                                  | Yes                                                 |
| <input checked="" type="checkbox"/> | <input type="checkbox"/> Public health              |
| <input checked="" type="checkbox"/> | <input type="checkbox"/> National security          |
| <input checked="" type="checkbox"/> | <input type="checkbox"/> Crops and/or livestock     |
| <input checked="" type="checkbox"/> | <input type="checkbox"/> Ecosystems                 |
| <input checked="" type="checkbox"/> | <input type="checkbox"/> Any other significant area |

## Experiments of concern

Does the work involve any of these experiments of concern:

- |                                     |                                                                                                      |
|-------------------------------------|------------------------------------------------------------------------------------------------------|
| No                                  | Yes                                                                                                  |
| <input checked="" type="checkbox"/> | <input type="checkbox"/> Demonstrate how to render a vaccine ineffective                             |
| <input checked="" type="checkbox"/> | <input type="checkbox"/> Confer resistance to therapeutically useful antibiotics or antiviral agents |
| <input checked="" type="checkbox"/> | <input type="checkbox"/> Enhance the virulence of a pathogen or render a nonpathogen virulent        |
| <input checked="" type="checkbox"/> | <input type="checkbox"/> Increase transmissibility of a pathogen                                     |
| <input checked="" type="checkbox"/> | <input type="checkbox"/> Alter the host range of a pathogen                                          |
| <input checked="" type="checkbox"/> | <input type="checkbox"/> Enable evasion of diagnostic/detection modalities                           |
| <input checked="" type="checkbox"/> | <input type="checkbox"/> Enable the weaponization of a biological agent or toxin                     |
| <input checked="" type="checkbox"/> | <input type="checkbox"/> Any other potentially harmful combination of experiments and agents         |

## Plants

|                       |                                  |
|-----------------------|----------------------------------|
| Seed stocks           | <input type="text" value="N/A"/> |
| Novel plant genotypes | <input type="text" value="N/A"/> |
| Authentication        | <input type="text" value="N/A"/> |

## ChIP-seq

### Data deposition

- Confirm that both raw and final processed data have been deposited in a public database such as [GEO](#).
- Confirm that you have deposited or provided access to graph files (e.g. BED files) for the called peaks.

|                                                                    |                                  |
|--------------------------------------------------------------------|----------------------------------|
| Data access links<br><i>May remain private before publication.</i> | <input type="text" value="N/A"/> |
| Files in database submission                                       | <input type="text" value="N/A"/> |
| Genome browser session<br>(e.g. <a href="#">UCSC</a> )             | <input type="text" value="N/A"/> |

### Methodology

|                         |                                  |
|-------------------------|----------------------------------|
| Replicates              | <input type="text" value="N/A"/> |
| Sequencing depth        | <input type="text" value="N/A"/> |
| Antibodies              | <input type="text" value="N/A"/> |
| Peak calling parameters | <input type="text" value="N/A"/> |
| Data quality            | <input type="text" value="N/A"/> |
| Software                | <input type="text" value="N/A"/> |

## Flow Cytometry

### Plots

Confirm that:

- The axis labels state the marker and fluorochrome used (e.g. CD4-FITC).
- The axis scales are clearly visible. Include numbers along axes only for bottom left plot of group (a 'group' is an analysis of identical markers).
- All plots are contour plots with outliers or pseudocolor plots.
- A numerical value for number of cells or percentage (with statistics) is provided.

### Methodology

|                           |                                  |
|---------------------------|----------------------------------|
| Sample preparation        | <input type="text" value="N/A"/> |
| Instrument                | <input type="text" value="N/A"/> |
| Software                  | <input type="text" value="N/A"/> |
| Cell population abundance | <input type="text" value="N/A"/> |
| Gating strategy           | <input type="text" value="N/A"/> |

- Tick this box to confirm that a figure exemplifying the gating strategy is provided in the Supplementary Information.

## Magnetic resonance imaging

### Experimental design

|                                 |                                  |
|---------------------------------|----------------------------------|
| Design type                     | <input type="text" value="N/A"/> |
| Design specifications           | <input type="text" value="N/A"/> |
| Behavioral performance measures | <input type="text" value="N/A"/> |

### Acquisition

|                               |                                                                 |
|-------------------------------|-----------------------------------------------------------------|
| Imaging type(s)               | <input type="text" value="N/A"/>                                |
| Field strength                | <input type="text" value="N/A"/>                                |
| Sequence & imaging parameters | <input type="text" value="N/A"/>                                |
| Area of acquisition           | <input type="text" value="N/A"/>                                |
| Diffusion MRI                 | <input type="checkbox"/> Used <input type="checkbox"/> Not used |

### Preprocessing

|                            |                                  |
|----------------------------|----------------------------------|
| Preprocessing software     | <input type="text" value="N/A"/> |
| Normalization              | <input type="text" value="N/A"/> |
| Normalization template     | <input type="text" value="N/A"/> |
| Noise and artifact removal | <input type="text" value="N/A"/> |
| Volume censoring           | <input type="text" value="N/A"/> |

### Statistical modeling & inference

|                           |                                                                                                       |
|---------------------------|-------------------------------------------------------------------------------------------------------|
| Model type and settings   | <input type="text" value="N/A"/>                                                                      |
| Effect(s) tested          | <input type="text" value="N/A"/>                                                                      |
| Specify type of analysis: | <input type="checkbox"/> Whole brain <input type="checkbox"/> ROI-based <input type="checkbox"/> Both |

Statistic type for inference

N/A

(See [Eklund et al. 2016](#))

Correction

N/A

## Models & analysis

n/a | Involved in the study

- Functional and/or effective connectivity
- Graph analysis
- Multivariate modeling or predictive analysis

Functional and/or effective connectivity

N/A

Graph analysis

N/A

Multivariate modeling and predictive analysis

N/A
